# Supplementary material for: Meta-analysis of HIV-1 vaccine elicited mucosal antibodies in humans
Source: PubMed Central journal article supplement (PMC8050318; doi:10.1038/s41541-021-00305-8), 2021-04-15
Supplement: 41541_2021_305_MOESM1_ESM.pdf [file 41541_2021_305_MOESM1_ESM.pdf]

1 SUPPLEMENTARY MATERIAL

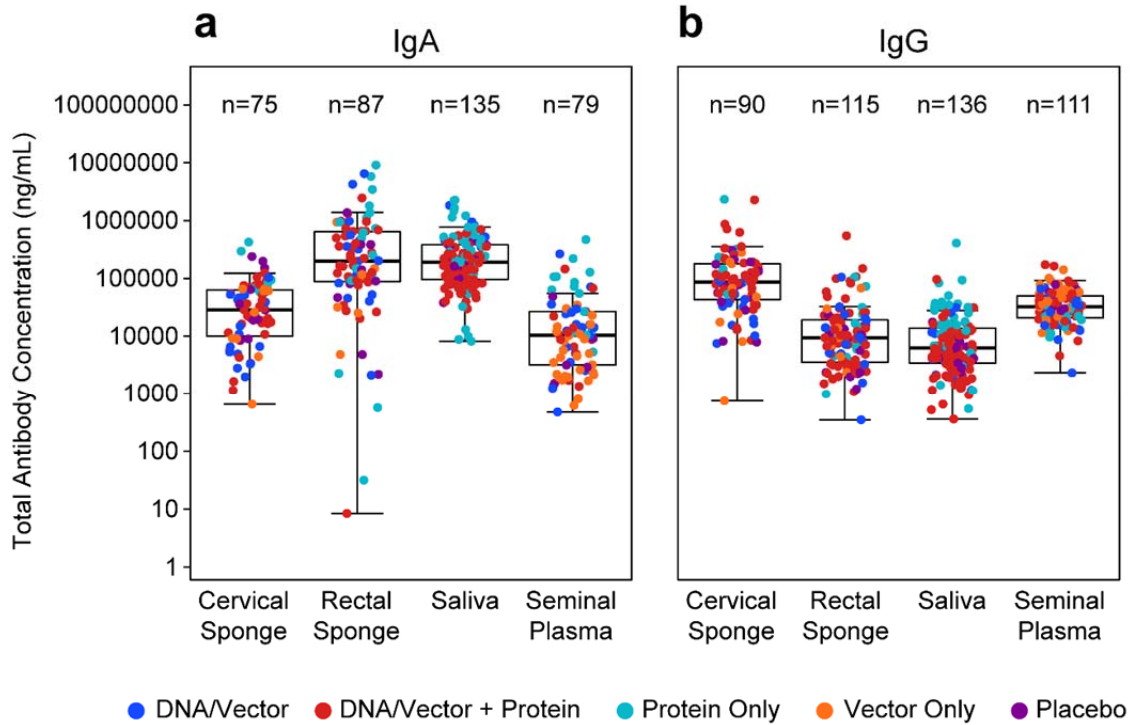

2  
3  
4  
5  
6  
7  
8  
9

**Supplementary Figure 1. Total Antibody concentrations.** Boxplots of total IgA and IgG concentrations by mucosal compartment are shown in **A. IgA** and **B. IgG**. The mid-line of the boxplot denotes the median response magnitude and the ends of the boxplot denote the 25<sup>th</sup> and 75<sup>th</sup> percentiles. Solid circles represent the observations of total IgA and IgG, which were color-coded for vaccine regimen types and placebo.

10 **Supplementary Table 1. Median Specific Activity Values by Vaccine Type and Mucosal**  
 11 **compartment.**

| Isotype    | Specimen Type      | Vaccine Group      | Median Response (SA) |             |         |
|------------|--------------------|--------------------|----------------------|-------------|---------|
|            |                    |                    | Con 6 gp120/B        | Con S gp140 | gp41    |
| <b>IgA</b> | Cervical<br>Sponge | DNA/Vector         | 0.00025              | 0.00034     | 0.00113 |
|            |                    | DNA/Vector+Protein | 0.00020              | 0.00020     | 0.00137 |
|            |                    | Placebo            | 0.00020              | 0.00020     | 0.00032 |
|            |                    | Protein            | 0.00020              | 0.00267     | 0.00631 |
|            |                    | Vector             | 0.00022              | 0.00020     | 0.00035 |
|            | Rectal<br>Sponge   | DNA/Vector         | 0.00020              | 0.00020     | 0.00055 |
|            |                    | DNA/Vector+Protein | 0.00020              | 0.00020     | 0.00113 |
|            |                    | Placebo            | 0.00020              | 0.00020     | 0.00157 |
|            |                    | Protein            | 0.00020              | 0.00020     | 0.00118 |
|            |                    | Vector             | 0.00020              | 0.00020     | 0.00057 |
|            | Saliva             | DNA/Vector         | 0.00020              | 0.00020     | 0.00021 |
|            |                    | Protein            | 0.00020              | 0.00020     | 0.00020 |
|            | Semen              | DNA/Vector         | 0.00020              | 0.00020     | 0.00120 |
|            |                    | Placebo            | 0.00069              | NA          | 0.00393 |
|            |                    | Protein            | 0.00080              | 0.00235     | 0.00692 |
|            |                    | Vector             | 0.00078              | NA          | 0.00170 |
| <b>IgG</b> | Cervical<br>Sponge | DNA/Vector         | 0.00027              | 0.01519     | 0.02212 |
|            |                    | DNA/Vector+Protein | 0.01588              | 0.05361     | 0.01598 |
|            |                    | Placebo            | 0.00020              | 0.00020     | 0.00053 |
|            |                    | Protein            | 0.02189              | 0.26914     | 0.31871 |
|            |                    | Vector             | 0.00030              | 0.00184     | 0.00896 |
|            | Rectal<br>Sponge   | DNA/Vector         | 0.00020              | 0.00036     | 0.00569 |
|            |                    | DNA/Vector+Protein | 0.01183              | 0.02628     | 0.00485 |
|            |                    | Placebo            | 0.00056              | 0.00071     | 0.00146 |
|            |                    | Protein            | 0.03526              | 0.31352     | 0.34506 |
|            |                    | Vector             | 0.00020              | 0.00020     | 0.00020 |
|            | Saliva             | DNA/Vector         | 0.00155              | 0.07355     | 0.09353 |
|            |                    | DNA/Vector+Protein | 0.01079              | 0.01336     | 0.00209 |
|            |                    | Placebo            | 0.00048              | 0.00042     | 0.00069 |
|            |                    | Protein            | 0.00305              | 0.02266     | 0.02233 |
|            | Semen              | DNA/Vector         | 0.00023              | 0.01920     | 0.00390 |
|            |                    | DNA/Vector+Protein | 0.02649              | 0.02280     | 0.00282 |
| Placebo    |                    | 0.00020            | 0.00020              | 0.00020     |         |
| Protein    |                    | 0.02552            | 0.26628              | 0.15374     |         |
|            |                    | Vector             | 0.00022              | 0.00469     | 0.00401 |

12 NA = Not applicable; SA values <0.0002 were set to a floor of 0.0002

13

14 **Supplementary Table 2. Median Binding Magnitude (MFI) in Serum by Vaccine Type.**

| Isotype    | Specimen Type | Vaccine Group      | Median Response (MFI) |                 |       |
|------------|---------------|--------------------|-----------------------|-----------------|-------|
|            |               |                    | Con 6 gp120/B         | Con S gp140 CFI | gp41  |
| <b>IgA</b> | Serum         | DNA/Vector         | <100                  | <100            | 151   |
|            |               | DNA/Vector+Protein | 285                   | 308             | 141   |
|            |               | Placebo            | <100                  | <100            | <100  |
|            |               | Protein            | <100                  | 1324            | 2165  |
|            |               | Vector             | <100                  | <100            | 137   |
| <b>IgG</b> | Serum         | DNA/Vector         | 149                   | 4936            | 21881 |
|            |               | DNA/Vector+Protein | 18584                 | 23000           | 9578  |
|            |               | Placebo            | <100                  | <100            | 172   |
|            |               | Protein            | 3567                  | 23000           | 23000 |
|            |               | Vector             | 605                   | 12760           | 23000 |

15

16 **SUPPLEMENTARY ACKNOWLEDGEMENTS**

17 HVTN 076 Study Team: Karen Mark<sup>5</sup>, Janine Maenza<sup>5</sup>, Ann Dueri<sup>5</sup>, Cecilia Morgan<sup>5</sup>, Stephen  
18 DeRosa<sup>5</sup>, Gabriela Diaz<sup>5</sup>, Niles Eaton<sup>5</sup>, Edith Swann<sup>6</sup>, Barney Graham<sup>19</sup>; HVTN 086 Study  
19 Team: Gavin Churchyard<sup>8</sup>, Shelly Karuna<sup>5</sup>, Peter Gilbert<sup>5,15</sup>, Lynn Morris<sup>20</sup>, Mary Allen<sup>6</sup>, Carolyn  
20 Williamson<sup>21</sup>, Anna-Lise Williamson<sup>21</sup>, Susan Barnett<sup>22</sup>; HVTN 088 Study Team: Paul  
21 Spearman<sup>7</sup>, Georgia Tomaras<sup>1,2,3,4</sup>, Marnie Elizaga<sup>5</sup>, Ying Huang<sup>5,15</sup>, Laissa Ouedraogo<sup>6</sup>, Mary  
22 Allen<sup>6</sup>, Susan Barnett<sup>22</sup>; HVTN 096 Study Team: Giuseppe Pantaleo<sup>13</sup>, Pierre-Alexandre Bart<sup>13</sup>,  
23 Shelly Karuna<sup>5</sup>, Holly Janes<sup>5</sup>, Shannon Grant<sup>5</sup>, Nicole Frahm<sup>5</sup>, Laissa Ouedraogo<sup>6</sup>, Mary Allen<sup>6</sup>,  
24 Song Ding<sup>23</sup>, Edna Venneker<sup>23</sup>, Carter Lee<sup>24</sup>; HVTN 097 Team: Glenda Gray<sup>5,12</sup>, Surita Roux<sup>5,12</sup>,  
25 Fatima Laher<sup>5,12</sup>, Nicole Grunenber<sup>5</sup>, Ying Huang<sup>5,15</sup>, Abby Isaacs<sup>5,15</sup>, Carissa Karg<sup>5</sup>, Ryan  
26 Jensen<sup>5</sup>, Gina Escamilla<sup>5</sup>, and Jill Zeller<sup>5</sup>, Edith Swann<sup>6</sup>, Georgia Tomaras<sup>1,2,3,4</sup>, Sanjay  
27 Phogat<sup>25</sup>, Carlos DiazGranados<sup>25</sup>, Carter Lee<sup>24</sup>, Faruk Sinangil<sup>24</sup>; HVTN 205 Team: Paul  
28 Goepfert<sup>10</sup>, Kelly Seaton<sup>1,2,3,4</sup>, Marnie Elizaga<sup>5</sup>, Alicia Sato<sup>5</sup>, Laissa Ouedraogo<sup>6</sup>, Julia Hutter<sup>6</sup>,

29 Laura Polakowski<sup>6</sup>, Harriett Robinson<sup>14</sup>, HVTN Quality Assurance Team: Marcella Sarzotti-  
30 Kelsoe<sup>26</sup>, Dan Ozaki<sup>26</sup>, HVTN Operations Team: John Hural<sup>5</sup>, On Ho<sup>5</sup>, Michael Stirewalt<sup>5</sup>,  
31 Mucosal Collections and Training Team: Philipp Mann<sup>5</sup>, Craig Innes<sup>5</sup>, Kathy Mngadi<sup>27</sup>,  
32 Blythe Adamson<sup>5</sup>, Alicia Yamamoto<sup>5</sup>, Jenna Udren<sup>5</sup>, Janine Maenza<sup>5, 11</sup>, David Berger<sup>5</sup>, Chris  
33 Galloway<sup>5</sup>

34 <sup>19</sup>Vaccine Research Center, National Institute of Allergy and Infectious Diseases, National  
35 Institutes of Health, Bethesda, Maryland, USA; <sup>20</sup>National Institute for Communicable Diseases,  
36 National Health Laboratory Services, Johannesburg, South Africa; <sup>21</sup>Institute of Infectious  
37 Disease and Molecular Medicine, University of Cape Town, South Africa; <sup>22</sup>Novartis Vaccines  
38 and Diagnostics, Cambridge, Massachusetts, USA; <sup>23</sup>EuroVacc Foundation, Lausanne,  
39 Switzerland; <sup>24</sup>Global Solutions for Infectious Diseases, South San Francisco, California, USA;  
40 <sup>25</sup>Sanofi Pasteur, Swiftwater, Pennsylvania, USA; <sup>26</sup>Quality Assurance for Vaccine  
41 Immunogenicity Programs, Duke University, Durham, NC, USA; <sup>27</sup>Tembisa Clinical Research  
42 Site, Johannesburg, South Africa
